# Supplementary material for: Manure in combination with optimal topdressing with nitrogen fertiliser improved growth, grain yields and the efficiencies of water and nitrogen use in winter wheat in the Xinjiang Oasis drylands
Source: PeerJ. 2025 Jun 13;13:e19543. doi: 10.7717/peerj.19543 (PMC12169170; doi:10.7717/peerj.19543)
Supplement: Supplemental Information 1 [file peerj-13-19543-s001.xlsx]

## Sheet: Experimental site conditions
	Soil base values for the 0-20 cm soil layer before sowing
Year					Mean
2021-2022	Soil water content（%）	11.7771	10.2133	10.7392	10.9099	0.795731
	pH (H2O)	8.25	8.28	8.16	8.23	0.06245
	Soil manure matter (g kg−1)	18.9692	12.9961	12.6633	14.8762	3.54854
	Soil total nitrogen (g kg−1)	1.139	1.137	1.273	1.183	0.0779487
	Soil available phosphorus(mg kg−1)	15.2868	11.0352	12.9248	13.0823	2.13017
	Soil available potassium(mg kg−1)	292.296	274.591	282.962	283.283	8.85688
2022-2023	Soil water content（%）	13.7841	13.8686	14.3771	14.0099	0.320765
	pH (H2O)	8.05	8.19	8.15	8.13	0.072111
	Soil manure matter (g kg−1)	16.1781	15.0608	15.5884	15.6091	0.558936
	Soil total nitrogen (g kg−1)	0.981333	1.06203	1.13553	1.05963	0.077128
	Soil available phosphorus(mg kg−1)	13.2762	15.43	14.2444	14.3169	1.0787
	Soil available potassium(mg kg−1)	302	310	305	305.667	4.04145
Air temperature (℃)
Year	Sept.	Oct.	Nov.	Dec.	Jan.	Feb.	Mar.	Apr.	May.	Jun.	Jul.
2021-2022	12.38	3.84	-4.39	-7.28	-8.87	-9.96	0.54	10.59	18.9	21.91	21.58
2022-2023	0	6.44	-3.31	-12.67	-12.21	-6.93	2.42	6.33	12.53	21.27	21.18
Precipitation (mm)
Year	Sept.	Oct.	Nov.	Dec.	Jan.	Feb.	Mar.	Apr.	May.	Jun.	Jul.
2021-2022	4.2	60.5	33.3	22	2.7	7.1	55	23.4	3	20.9	4.8
2022-2023	0	16.6	40.9	23	16.9	7	12.3	56.1	41.5	15.5	11.9

## Sheet: Crop growth indicators
Treatment		LAI			Mean		Aboveground biomass (kg ha-1)			Mean		Pn (µmol·m−2·s−1)			Mean		Tr (mmol·m−2·s−1)			Mean
2021-2022	M0N0	0.44695	0.482844	0.491168	0.473654	0.023498	3301.44	3745.04	3970.54	3672.34	340.424	12.585	12.765	12.985	12.7783	0.200333	4.125	3.835	3.625	3.86167	0.251064
	M0N150	0.71504	0.705199	0.651939	0.690726	0.033949	5186.4	5884.2	6212.73	5761.11	524.119	14.27	13.62	13.305	13.7317	0.492096	3.82	3.57	4.595	3.995	0.534439
	M0N300	0.754143	0.766995	0.770555	0.763898	0.00863289	5557.55	5803.45	6080.88	5813.96	261.825	13.655	11.765	14.07	13.1633	1.22864	4.375	3.775	3.56	3.90333	0.422384
	M1N0	0.613922	0.616575	0.642873	0.624457	0.0160038	4471.89	5053	5238.28	4921.05	399.868	12.755	12.615	10.7	12.0233	1.14818	3.88	3.76	3.69	3.77667	0.0960902
	M1N150	0.887	0.964028	1.00152	0.95085	0.0583865	6703.1	7038.06	7704.82	7148.66	509.939	14.96	12.74	13.525	13.7417	1.12575	4.52	4.22	3.64	4.12667	0.447363
	M1N300	0.854044	0.891989	0.8199	0.855311	0.0360611	6192.54	7404.45	7489	7028.66	725.335	10.595	10.23	12.795	11.2067	1.38759	3.325	3.645	3.455	3.475	0.160935
2022-2023	M0N0	0.997031	0.957365	0.883377	0.945924	0.0576844	6979.49	7482.7	6592.97	7018.38	446.137	16.25	17.26	16.62	16.71	0.510979	4.66	4.26	4.58	4.5	0.21166
	M0N150	1.61127	1.56578	1.55932	1.57879	0.0283144	9589.77	8777.63	8547.63	8971.68	547.501	18.14	20.41	19.17	19.24	1.13662	5.27	4.81	5.55	5.21	0.373631
	M0N300	1.52512	1.43218	1.46936	1.47555	0.0467776	7909.61	8447.05	9072.5	8476.39	581.997	19.11	18.18	20.07	19.12	0.94504	5.04	4.31	5.59	4.98	0.642106
	M1N0	1.61867	1.75224	1.76751	1.71281	0.0818808	9499.09	9189.13	9970.63	9552.95	393.522	18.19	17.89	17.3	17.7933	0.452806	6.86	5.77	5.29	5.97333	0.804508
	M1N150	1.9214	2.14573	2.03226	2.03313	0.112168	11275.5	12296.2	11202.4	11591.4	611.449	20.093	21.93	22.52	21.5143	1.26577	6.42	5.89	5.93	6.08	0.295127
	M1N300	1.73649	1.90239	2.0488	1.89589	0.156256	10371.7	9443.54	9634.8	9816.66	490.057	20.82	18.28	19.33	19.4767	1.27634	5.84	4.86	4.76	5.15333	0.596769

## Sheet: Grain yield,NUE
Treatment		Spike numbers (×104 ha−1)			Mean		Grain number (spike−1)			Mean		1000-grain weight (g)			Mean		Grain yield (kg ha−1)			Mean		Crop N uptake (kg ha−1)			Mean		NUE(%)			Mean
2021-2022	M0N0	125.334	136.001	149.334	136.89	12.0247	38.875	39.85	39.1	39.275	0.510514	31.95	30.256	31.088	31.098	0.847044	1729.08	1619.75	1505.92	1618.25	111.583	43.9105	51.0776	49.5369	48.175	3.77264	/	/	/	/	/
	M0N150	189.334	205.334	218.668	204.445	14.6869	36.275	36.0714	34.8	35.7155	0.799333	28.17	28.034	28.852	28.352	0.43832	2205.11	2352.26	2103.07	2220.15	125.271	66.8651	59.1862	64.8597	63.637	3.9828	25.1133	19.9741	22.1386	22.4086	2.58024
	M0N300	205.334	193.334	197.334	198.668	6.11013	35.825	37	35.3158	36.0469	0.86376	28.548	27.3965	28.571	28.1718	0.671557	2038.84	2207.72	2003.98	2083.52	108.966	75.7475	70.2727	71.1831	72.4011	2.93359	15.026	17.8767	19.7627	17.5551	2.38471
	M1N0	185.334	194.668	170.668	183.556	12.0984	40.15	40.85	39.8	40.2667	0.534634	29.784	31.088	30.803	30.5583	0.685566	2115.38	2205.17	2020.66	2113.74	92.2651	63.3758	57.8223	56.7532	59.3171	3.55536	/	/	/	/	/
	M1N150	232.001	241.335	224.001	232.446	8.67525	36.55	37.9	38.25	37.5667	0.897682	28.895	28.77	27.914	28.5263	0.533967	2488.5	2624.76	2435.76	2516.34	97.5272	80.2256	78.4871	85.3291	81.3473	3.55621	34.715	32.4686	28.6	31.9279	3.09314
	M1N300	224.001	200.001	216.001	213.334	12.2203	39.05	37.8	40.15	39	1.1758	28.894	29.004	29.706	29.2013	0.440501	2169.36	2344.13	2322.49	2278.66	95.2762	88.4627	87.4387	93.4384	89.7799	3.20942	22.5091	22.2032	21.5112	22.0745	0.511241
2022-2023	M0N0	333.868	345.602	338.135	339.202	5.93898	31.5	29.5	31.2105	30.7368	1.08087	28	26.626	27.18	27.2687	0.691278	2740.68	2630.07	2514.69	2628.48	113.002	85.8583	88.8378	80.7807	85.1589	4.07385	/	/	/	/	/
	M0N150	398.935	432.002	406.402	412.447	17.3423	35.05	35.8	35.8	35.55	0.433013	23.32	24.12	23.03	23.49	0.564535	3008.82	2906.19	2791.21	2902.07	108.859	115.082	108.245	106.499	109.942	4.5362	32.4445	38.0349	37.2726	35.9173	3.03164
	M0N300	410.669	409.602	389.335	403.202	12.0208	35.55	33.55	33	34.0333	1.34195	24.654	25.472	24.81	24.9787	0.434301	2930.59	2707.05	2871.32	2836.32	115.804	114.415	116.191	123.692	118.099	4.92404	21.9804	25.2567	24.3728	23.87	1.69502
	M1N0	481.069	439.469	442.669	454.402	23.1495	33.95	33.6	32.2	33.25	0.926013	22.836	23.028	22.296	22.72	0.379537	2874.37	2901.09	3048.42	2941.29	93.7262	115.06	115.745	123.222	118.009	4.52732	/	/	/	/	/
	M1N150	475.736	453.336	480.002	469.691	14.3242	36.75	35.25	36.75	36.25	0.866025	22.276	23.33	22.504	22.7033	0.554553	3109.75	3279.7	3094.06	3161.17	102.949	148.756	155.27	146.269	150.098	4.64808	45.2296	47.8425	46.4463	46.5061	1.30749
	M1N300	455.469	461.869	430.935	449.424	16.3286	35.6316	34.8	33.45	34.6272	1.10101	22.99	23.692	23.974	23.552	0.506719	2980.68	2988.6	3131.58	3033.62	84.9248	155.05	152.856	150.103	152.67	2.47852	27.3879	24.8977	23.0641	25.1165	2.17018

## Sheet: SWS,ET,WUE
Treatment		ETc(mm)			Mean		WUE (kg ha–1 mm–1)			Mean
2021-2022	M0N0	216.55	218.428	205.189	213.389	7.16346	7.98463	7.41549	7.33922	7.57978	0.352679
	M0N150	234.253	239.911	221.316	231.827	9.53186	9.41338	9.80472	9.50259	9.57356	0.205099
	M0N300	226.41	231.44	218.127	225.326	6.72236	9.00508	9.53906	9.18724	9.2438	0.271444
	M1N0	228.747	235.133	218.251	227.377	8.52392	9.24769	9.3784	9.25843	9.29484	0.0725641
	M1N150	231.27	242.288	224.608	232.722	8.92909	10.7602	10.8332	10.8445	10.8126	0.0457745
	M1N300	239.879	250.669	231.466	240.671	9.62584	9.04355	9.35151	10.0339	9.47631	0.50681
2022-2023	M0N0	321.774	319.108	333.82	324.901	7.83862	8.51741	8.24193	7.53308	8.09747	0.507819
	M0N150	334.178	332.767	346.787	337.911	7.71968	9.00363	8.7334	8.04877	8.59527	0.492186
	M0N300	326.603	324.915	339.653	330.39	8.06624	8.97295	8.33159	8.45369	8.58607	0.340559
	M1N0	328.136	327.237	341.369	332.247	7.91259	9.2901	8.86544	8.42014	8.85856	0.435022
	M1N150	332.272	326.622	341.867	333.587	7.70735	9.35905	10.0413	9.05046	9.48359	0.507009
	M1N300	342.604	338.765	351.137	344.169	6.33249	8.70008	8.82205	8.91839	8.81351	0.109408
Soil water storage (mm)	Treatment		0-20 cm			Mean		20-40cm			Mean		40-60cm			Mean		60-80cm			Mean		80-100cm			Mean
	2021-2022 (anthesis stage)	M0N0	28.3377	25.2258	28.8435	27.469	1.95904	31.8389	30.8098	31.1206	31.2564	0.5278	45.0155	41.8547	43.8274	43.5659	1.59659	45.5642	43.4943	45.7281	44.9289	1.24507	47.2999	45.2847	46.7509	46.4452	1.04182
		M0N150	23.9727	22.7653	22.8143	23.1841	0.683395	25.5346	22.715	24.973	24.4075	1.49242	34.9013	32.4638	35.237	34.2007	1.51357	37.855	38.5214	40.2292	38.8685	1.22461	41.1009	39.2096	41.0172	40.4425	1.06858
		M0N300	24.8768	22.3501	24.401	23.876	1.34268	29.4553	26.7658	29.3496	28.5236	1.52323	35.45	35.5444	35.9155	35.6366	0.246073	39.8761	39.0719	41.1039	40.0173	1.02331	39.4529	40.5089	42.0312	40.6644	1.29617
		M1N0	25.9699	25.5092	27.487	26.322	1.03483	28.0102	26.7634	28.5374	27.7703	0.910985	36.8346	36.0173	38.05	36.9673	1.02279	40.7571	39.6632	42.1459	40.8554	1.24425	40.5909	41.7002	41.3565	41.2159	0.567857
		M1N150	22.5489	21.2618	22.4767	22.0958	0.723196	25.9043	24.3655	25.9117	25.3938	0.890545	30.5288	32.3154	32.4853	31.7765	1.08387	40.5175	38.9689	37.9066	39.131	1.31298	40.1012	41.2793	42.462	41.2808	1.18036
		M1N300	20.3654	21.1014	22.8356	21.4341	1.26827	25.2434	22.3454	25.2551	24.2813	1.67656	29.8257	28.1916	29.8776	29.2983	0.958803	34.0777	33.4355	36.799	34.7707	1.78568	40.5218	39.0742	40.8371	40.1444	0.940095
	2021-2022 (maturity stage)	M0N0	16.4973	15.0566	17.5434	16.3658	1.24862	25.0549	22.929	24.1334	24.0391	1.06611	27.3697	28.112	26.663	27.3815	0.724557	30.637	30.6678	31.6761	30.9936	0.591241	32.1576	32.634	35.0801	33.2906	1.568
		M0N150	14.3598	13.0152	14.6746	14.0165	0.881334	19.0171	19.0806	20.8793	19.659	1.05727	23.9522	21.7633	24.2203	23.3119	1.34783	26.4843	25.5461	27.1032	26.3779	0.784013	30.2007	29.5112	31.0913	30.2677	0.792172
		M0N300	15.3491	13.0851	15.134	14.5227	1.24966	21.3745	19.2516	21.0747	20.567	1.14894	23.3527	22.5175	24.4756	23.4486	0.982576	29.4486	27.4266	30.6967	29.1906	1.65026	32.3316	33.1065	31.7767	32.405	0.66794
		M1N0	15.147	12.7343	15.0491	14.3102	1.36558	19.3232	20.2522	22.092	20.5558	1.40917	23.4326	21.4215	23.5923	22.8155	1.20985	30.0069	27.9981	30.0263	29.3438	1.16542	31.6098	30.2877	31.2736	31.057	0.68715
		M1N150	15.7288	13.7982	14.2551	14.594	1.00892	20.4176	18.7954	20.3342	19.8491	0.91341	22.0574	20.3047	23.1693	21.8438	1.44417	29.1905	27.2321	28.2174	28.2134	0.979193	29.603	27.4088	28.701	28.5709	1.10291
		M1N300	13.5538	11.6791	13.3583	12.8637	1.03059	20.4367	18.2603	19.7599	19.4857	1.11385	22.0768	20.6118	22.6934	21.794	1.06923	24.4774	23.6746	25.134	24.4287	0.730933	26.8432	24.9329	26.8733	26.2164	1.11171
Soil water storage (mm)	Treatment		0-20 cm			Mean		20-40cm			Mean		40-60cm			Mean		60-80cm			Mean		80-100cm			Mean
	2022-2023 (anthesis stage)	M0N0	19.9529	18.3045	18.5279	18.9284	0.894207	23.5527	20.5503	23.14	22.4143	1.62745	28.5339	27.4912	27.9063	27.9771	0.524958	32.0858	29.5394	30.0229	30.5493	1.35241	33.0127	31.332	30.8575	31.7341	1.13244
		M0N150	18.8085	17.0109	19.069	18.2961	1.12063	21.1362	19.5165	21.4046	20.6858	1.02147	24.901	21.1928	22.5301	22.8746	1.87792	27.1076	25.73	26.4174	26.4183	0.688773	32.2658	29.8571	29.7861	30.6363	1.41162
		M0N300	19.7856	16.9294	19.4398	18.7182	1.55883	22.0207	20.5434	19.8389	20.801	1.11348	27.3292	24.9873	27.6904	26.669	1.46752	31.4738	29.184	29.1849	29.9476	1.32177	32.0497	29.7862	31.1989	31.0116	1.14331
		M1N0	20.017	17.396	17.9444	18.4524	1.38239	20.9595	18.5029	20.6913	20.0512	1.34759	23.1344	20.9148	22.4785	22.1759	1.1403	26.8636	24.0524	24.6605	25.1922	1.47907	30.6046	29.6945	29.0658	29.7883	0.773675
		M1N150	20.2139	17.2483	17.9866	18.4829	1.54381	21.4605	18.263	20.7911	20.1715	1.6864	23.1992	21.1139	23.1727	22.4953	1.19634	28.7201	25.9838	27.3332	27.3457	1.3682	32.2152	29.4008	29.9278	30.5146	1.49615
		M1N300	18.3925	16.0727	18.4158	17.627	1.34608	21.2317	18.5817	18.7983	19.5372	1.47142	22.5154	20.6201	22.2971	21.8109	1.03698	25.0021	23.3109	24.5323	24.2818	0.872984	29.8656	27.0404	29.7229	28.8763	1.59154
	2022-2023 (maturity stage)	M0N0	17.4206	17.6228	16.1398	17.0611	0.804206	19.3583	19.7227	17.7273	18.9361	1.06259	21.9916	21.7807	19.4883	21.0869	1.38841	21.9189	24.2723	22.2696	22.8203	1.26967	27.4353	27.0793	25.3648	26.6265	1.10707
		M0N150	16.6187	15.9793	15.9161	16.1714	0.388681	17.005	16.7963	14.8987	16.2333	1.16049	20.074	19.2197	18.4344	19.2427	0.820029	20.8663	20.7792	18.7015	20.1157	1.22547	21.1565	23.0446	21.0717	21.7576	1.11538
		M0N300	17.9113	17.5939	15.6836	17.0629	1.20504	17.9568	17.8158	16.6491	17.4739	0.71778	19.1793	21.4288	18.4199	19.676	1.56471	21.6437	21.2256	19.7847	20.8847	0.975262	26.6048	26.6073	24.6197	25.944	1.14686
		M1N0	16.7798	16.4462	15.1135	16.1132	0.881658	18.2419	18.3799	16.9658	17.8625	0.779673	18.3821	19.1374	17.9985	18.506	0.579493	21.4711	21.3949	19.7467	20.8709	0.974321	25.8877	26.9911	24.6164	25.8317	1.18829
		M1N150	16.6531	16.2313	15.5493	16.1446	0.556968	18.1152	18.7744	17.4182	18.1026	0.678174	19.7874	19.4449	17.8438	19.0254	1.03753	20.3594	22.2836	20.0456	20.8962	1.21172	22.7115	25.2299	23.0858	23.6757	1.35891
		M1N300	14.7589	15.9189	13.8463	14.8414	1.03876	15.5312	15.0677	14.2942	14.9644	0.624925	18.0246	19.4455	17.1043	18.1915	1.17944	19.133	21.3816	18.6305	19.715	1.46501	19.8468	20.0072	18.7979	19.5506	0.656806
